# Supplementary material for: A Structure-Related Fine-Grained Deep Learning System With Diversity Data for Universal Glaucoma Visual Field Grading
Source: PubMed Central journal article supplement (PMC8968343; doi:10.3389/fmed.2022.832920), 2022-03-17
Supplement: Data_Sheet_1.pdf [file Data_Sheet_1.pdf]

## *Supplementary Material*

### **1 Supplementary Figures and Tables**

#### **1.1 Supplementary Figures**

**Supplementary Figure 1.** Performance of predicting results of humans for Humphrey Field Analyzer (HFA) data. The confusion matrixes (CMs) of predicting accuracy of **(A-C)**, three ophthalmic clinicians, **(D-E)**, two senior medical students, and **(F-G)**, junior medical students. **(H)**, Histogram of the total accuracy of humans compared with the FGGDL for HFA data. Cl, Clear visual field (VF); Mi, Mild VF defect; Mo, Moderate VF defect; Se, Severe VF defect; Di, Diffuse VF defect; Senior, senior medical student; Junior, junior medical student.

**Supplementary Figure 2.** Performance of predicting results of humans for Octopus data. The confusion matrixes (CMs) of predicting accuracy of **(A-C)**, three clinicians, **(D-E)**, two senior medical students, and **(F-G)**, junior medical students. **(H)**, Histogram of total accuracy of humans compared with the FGGDL for Octopus data. Cl, Clear visual field (VF); Mi, Mild VF defect; Mo, Moderate VF defect; Se, Severe VF defect; Di, Diffuse VF defect; Senior, senior medical student; Junior, junior medical student.

**Supplementary Figure 3.** **(A)** The process of the cross-validation study. **(B)** The main operation interface is shown with description of each functional module. The steps 1–3 in the left bottom illustrates the usage of the interface. And the follow-up and treatment recommendations referred to clinical guidelines are shown in the right bottom. VF, visual field; NA, not available; Cl, Clear VF; Mi, Mild VF defect; Mo, Moderate VF defect; Se, Severe VF defect; Di, Diffuse VF defect.

#### **1.2 Supplementary Tables**

|                               | category      |               |               |               |                | total          |
|-------------------------------|---------------|---------------|---------------|---------------|----------------|----------------|
|                               | 1             | 2             | 3             | 4             | 5              |                |
| <b>External dataset - HFA</b> |               |               |               |               |                |                |
| <b>patients</b>               | 11            | 23            | 27            | 44            | 22             | 93             |
| <b>age Mean (SD)</b>          | 37.88 (18.25) | 52.52 (20.81) | 60.60 (10.11) | 61.73 (12.90) | 61.74 (16.55)  | 57.43 (16.79)  |
| <b>male (n%)</b>              | 4 (36.36%)    | 9 (39.13%)    | 10 (43.48%)   | 20 (45.45%)   | 14 (63.64%)    | 43 (46.24%)    |
| <b>eyes</b>                   | 16            | 25            | 30            | 56            | 23             | 150            |
| <b>VFs</b>                    | 16            | 25            | 30            | 56            | 23             | 150            |
| <b>right (n%)</b>             | 9 (56.25%)    | 12 (48.00%)   | 16 (53.33%)   | 27 (48.21%)   | 12 (52.17%)    | 76 (50.67%)    |
| <b>MD Mean (SD)</b>           | -1.53 (0.91)  | -3.03 (0.86)  | -6.04 (2.17)  | -19.63 (6.90) | -19.88 (11.44) | -12.25 (10.09) |
| <b>PSD Mean (SD)</b>          | 1.57 (0.18)   | 2.11 (0.44)   | 4.28 (2.38)   | 7.78 (2.15)   | 3.56 (1.94)    | 4.82 (3.06)    |

**Supplementary Table 1.** Demographic data of patients in external dataset of HFA data. HFA = Humphrey field analyzer; VF = visual field; MD = mean deviation; right = right eyes; SD = standard deviation; PSD = pattern standard deviation.

|                                     | category      |               |               |               |               | total         |
|-------------------------------------|---------------|---------------|---------------|---------------|---------------|---------------|
|                                     | 1             | 2             | 3             | 4             | 5             |               |
| <b>Real world dataset - Octopus</b> |               |               |               |               |               |               |
| <b>patients</b>                     | 19            | 30            | 34            | 31            | 17            | 55            |
| <b>age Mean (SD)</b>                | 44.56 (14.06) | 39.54 (13.43) | 39.51 (15.79) | 49.37 (16.72) | 48.32 (16.45) | 43.51 (15.85) |
| <b>male (n%)</b>                    | 9 (47.37%)    | 15 (50.00%)   | 17 (50.00%)   | 17 (54.84%)   | 9 (52.94%)    | 30 (54.55)    |
| <b>eyes</b>                         | 27            | 45            | 47            | 42            | 19            | 100           |
| <b>VFs</b>                          | 54            | 103           | 105           | 104           | 34            | 400           |
| <b>right (n%)</b>                   | 29 (53.70%)   | 45 (43.69%)   | 57 (54.29%)   | 55 (52.88%)   | 14 (48.32%)   | 200 (50.00%)  |
| <b>MD Mean (SD)</b>                 | 0.82 (1.09)   | 3.00 (1.01)   | 5.99 (1.68)   | 13.32 (4.58)  | 14.52 (7.36)  | 7.15 (5.98)   |
| <b>sLV Mean (SD)</b>                | 1.87 (0.45)   | 2.57 (0.60)   | 4.93 (2.26)   | 6.92 (1.77)   | 5.40 (2.32)   | 4.47 (2.50)   |

**Supplementary Table 2.** Demographic data of patients in real world test dataset of Octopus data. VF = visual field; MD = mean deviation; sLV = square root of loss variance; right = right eyes; SD = standard deviation.

|                         | F1 score of each category     |                               |                               |                               |                               |
|-------------------------|-------------------------------|-------------------------------|-------------------------------|-------------------------------|-------------------------------|
|                         | 1                             | 2                             | 3                             | 4                             | 5                             |
| <b>Clinician 1</b>      | 0.929<br>(0.875~0.981)        | 0.823<br>(0.736~0.907)        | 0.819<br>(0.736~0.901)        | 0.788<br>(0.700~0.876)        | 0.840<br>(0.756~0.923)        |
| <b>Clinician 2</b>      | 0.909<br>(0.845~0.973)        | 0.686<br>(0.575~0.796)        | 0.709<br>(0.612~0.807)        | 0.821<br>(0.758~0.877)        | 0.873<br>(0.810~0.930)        |
| <b>Clinician 3</b>      | 0.922<br>(0.862~0.981)        | 0.781<br>(0.685~0.876)        | 0.733<br>(0.634~0.831)        | 0.794<br>(0.717~0.867)        | 0.855<br>(0.776~0.932)        |
| <b>Senior student 1</b> | 0.847<br>(0.788~0.900)        | 0.656<br>(0.540~0.770)        | 0.767<br>(0.685~0.847)        | 0.785<br>(0.692~0.874)        | 0.852<br>(0.771~0.932)        |
| <b>Senior student 2</b> | 0.884<br>(0.832~0.932)        | 0.667<br>(0.553~0.779)        | 0.735<br>(0.645~0.825)        | 0.755<br>(0.656~0.854)        | 0.811<br>(0.721~0.900)        |
| <b>Junior student 1</b> | 0.855<br>(0.775~0.935)        | 0.793<br>(0.705~0.880)        | 0.729<br>(0.645~0.810)        | 0.760<br>(0.661~0.858)        | 0.698<br>(0.589~0.802)        |
| <b>Junior student 2</b> | 0.873<br>(0.800~0.946)        | 0.710<br>(0.602~0.817)        | 0.749<br>(0.668~0.827)        | 0.788<br>(0.694~0.879)        | 0.790<br>(0.698~0.882)        |
| <b>FGGDL</b>            | <b>0.958</b><br>(0.916~0.998) | <b>0.887</b><br>(0.817~0.958) | <b>0.869</b><br>(0.796~0.942) | <b>0.877</b><br>(0.808~0.946) | <b>0.883</b><br>(0.814~0.948) |

**Supplementary Table 3.** F1 scores of Humphrey Field Analyzer (HFA) data of FGGDL and humans in each category. F1 scores are presented with 95% CIs. Bold text indicates the highest F1 score in each category and overall.

|                         | F1 score of each category     |                               |                               |                               |                               |
|-------------------------|-------------------------------|-------------------------------|-------------------------------|-------------------------------|-------------------------------|
|                         | 1                             | 2                             | 3                             | 4                             | 5                             |
| <b>Clinician 1</b>      | 0.821<br>(0.660~0.947)        | 0.720<br>(0.531~0.909)        | 0.830<br>(0.684~0.969)        | <b>0.973</b><br>(0.929~1.016) | <b>0.894</b><br>(0.759~1.028) |
| <b>Clinician 2</b>      | 0.759<br>(0.509~1.004)        | 0.741<br>(0.565~0.916)        | 0.772<br>(0.608~0.935)        | 0.889<br>(0.807~0.970)        | 0.698<br>(0.487~0.908)        |
| <b>Clinician 3</b>      | 0.788<br>(0.568~1.008)        | 0.678<br>(0.500~0.854)        | 0.596<br>(0.383~0.800)        | 0.893<br>(0.816~0.967)        | 0.850<br>(0.706~0.965)        |
| <b>Senior student 1</b> | 0.800<br>(0.633~0.930)        | 0.630<br>(0.435~0.824)        | 0.603<br>(0.422~0.784)        | 0.816<br>(0.708~0.922)        | 0.750<br>(0.545~0.949)        |
| <b>Senior student 2</b> | 0.688<br>(0.432~0.943)        | 0.653<br>(0.450~0.856)        | 0.625<br>(0.470~0.776)        | 0.772<br>(0.654~0.889)        | 0.737<br>(0.525~0.933)        |
| <b>Junior student 1</b> | 0.681<br>(0.496~0.825)        | 0.375<br>(0.198~0.551)        | 0.339<br>(0.157~0.520)        | 0.739<br>(0.613~0.858)        | 0.632<br>(0.394~0.863)        |
| <b>Junior student 2</b> | 0.800<br>(0.594~1.003)        | 0.776<br>(0.597~0.953)        | 0.633<br>(0.478~0.784)        | 0.500<br>(0.338~0.647)        | 0.492<br>(0.304~0.678)        |
| <b>FGGDL</b>            | <b>0.933</b><br>(0.819~1.028) | <b>0.800</b><br>(0.624~0.972) | <b>0.839</b><br>(0.702~0.975) | 0.898<br>(0.821~0.975)        | 0.756<br>(0.563~0.948)        |

**Supplementary Table 4.** F1 scores of Octopus data of FGGDL and humans in each category. F1 scores are presented with 95% CIs. Bold text indicates the highest F1 score in each category and overall.

| category | Damaged sectors      |                     | <i>p</i> value |
|----------|----------------------|---------------------|----------------|
|          | VF                   | Fundus              |                |
| 1        | 0.067 (-0.028±0.161) | 0.733 (0.330±1.137) | 0.003          |
| 2        | 1.800 (1.552±2.048)  | 1.733 (1.342±2.125) | 0.702          |
| 3        | 3.900 (3.600±4.200)  | 4.100 (3.703±4.497) | 0.206          |
| 4        | 7.467 (7.161±7.773)  | 7.400 (6.955±7.845) | 0.745          |
| 5        | 9.700 (9.438±9.962)  | 9.500 (9.227±9.773) | 0.161          |

**Supplementary Table 5.** The number of damaged sectors is presented with 95% CIs. VF=visual field

## 2 Other Supplementary Materials

**Supplementary Video.** The demo video of the interactive interface. It demonstrates the analysis of two visual field (VF) reports of right eye of one patient. And the interface gives the follow-up and treatment recommendation according to the progress.
